# Supplementary material for: Comparative temporal metabolomics studies to investigate interspecies variation in three Ocimum species
Source: PubMed Central journal article supplement (PMC7089951; doi:10.1038/s41598-020-61957-5), 2020-03-23
Supplement: 41598_2020_61957_MOESM1_ESM.pdf [file 41598_2020_61957_MOESM1_ESM.pdf]

**Comparative temporal metabolomics studies to investigate interspecies variation in three *Ocimum* species**

Shubhra Rastogi<sup>1</sup>, Saumya Shah<sup>2</sup>, Ritesh Kumar<sup>2</sup>, Ajay Kumar<sup>2</sup>, Ajit Kumar Shasany<sup>2\*</sup>

<sup>1</sup>Centre for Biotechnology, Shiksha 'O' Anusandhan University, Bhubaneswar- 751003, Odisha, India

<sup>2</sup>Biotechnology Division, CSIR- Central Institute of Medicinal and Aromatic Plants, PO CIMAP, Lucknow-226015, UP, India

\*Corresponding author e-mail:

ak.shasany@cimap.res.in

## SUPPLEMENTARY INFORMATION

**Supplementary table 1.** Details of primer sequences used for qRT-PCR analysis of phenylpropanoid pathway genes.

| S. No. | Name of primers | Primer Sequence (5' – 3')  | Details                                                                                                                                    |
|--------|-----------------|----------------------------|--------------------------------------------------------------------------------------------------------------------------------------------|
| 1      | Actin_SyF       | AGATTCCTCCAGCAAATCTTTCTC   | Forward primer for Actin designed from SRA study acc. no. SRP039008 (transcript id: Locus_4043_Transcript_3/5_Confidence_0.368_Length_944) |
| 2      | Actin_SyR       | CTTTCTGGTGGAACAGCATCAA     | Reverse primer for Actin designed from SRA study acc. no. SRP039008 (transcript id: Locus_4043_Transcript_3/5_Confidence_0.368_Length_944) |
| 3      | PAL_SyF         | TCCCAACGAGTTCACATCTTGAT    | Forward primer for PAL designed from SRA study acc. no. SRP039008 (transcript id: Locus_19788_Transcript_1/1_Confidence_1.000_Length_2482) |
| 4      | PAL_SyR         | TTGGCTAATCCCGTGACTION ACC  | Reverse primer for PAL designed from SRA study acc. no. SRP039008 (transcript id: Locus_19788_Transcript_1/1_Confidence_1.000_Length_2482) |
| 5      | C4H_SyF         | TTGGTCCGGGAGTCCAAATA       | Forward primer for C4H designed from SRA study acc. no. SRP039008 (transcript id: Locus_2389_Transcript_3/4_Confidence_0.600_Length_2035)  |
| 6      | C4H_SyR         | TCACGGCCTGAAGGTATGG        | Reverse primer for C4H designed from SRA study acc. no. SRP039008 (transcript id: Locus_2389_Transcript_3/4_Confidence_0.600_Length_2035)  |
| 7      | 4CL_SyF         | AAGAAGCTGTCAAGGAATTCATTTTC | Forward primer for 4CL designed from accession no. HM990148                                                                                |
| 8      | 4CL_SyR         | GGGAATGGCATGGACAAAGA       | Reverse primer for 4CL designed from accession no. HM990148                                                                                |
| 9      | C3H_SyF         | AGGGATGGCCAGGATCTGA        | Forward primer for C3H designed from accession no. HM990156                                                                                |
| 10     | C3H_SyR         | ACACACTTTTCTCACCTTGACGTAGT | Reverse primer for C3H designed from accession no. HM990156                                                                                |
| 11     | COMT_SyF        | CATGGAGCTACTCAAATGAACAAATT | Forward primer for COMT designed from accession no. HM990153                                                                               |
| 12     | COMT_SyR        | GACTCAACCACCCCCAAA         | Reverse primer for COMT designed from accession no. HM990153                                                                               |
| 13     | CCR_SyF         | GCGGCTGAGGCCAAAGT          | Forward primer for CCR designed from SRA study acc. no. SRP039008 (transcript id: Locus_3266_Transcript_3/3_Confidence_0.600_Length_1300)  |
| 14     | CCR_SyR         | GATCCATGTAGATTGCACCGATT    | Reverse primer for CCR designed from SRA study acc. no. SRP039008 (transcript id: Locus_3266_Transcript_3/3_Confidence_0.600_Length_1300)  |
| 15     | CAD_SyF         | AATTTGTCTCCCAATGGTGAT      | Forward primer for CAD designed from accession no. HM990152                                                                                |
| 16     | CAD_SyR         | GCTCTTTCATGCTTCCAATGAA     | Reverse primer for CAD designed from accession no. HM990152                                                                                |
| 17     | EGS_SyF         | ATGGAGGAAAATGGGATGAAAAGCA  | Forward primer for EGS designed from accession no. DQ372812                                                                                |
| 18     | EGS_SyR         | TTAAAATGCTGCTGAAGCCGGC     | Reverse primer for EGS designed from accession no. DQ372812                                                                                |
| 19     | EOMT_SyF        | GCCTCGCGCTCCTCTTG          | Forward primer for EOMT designed from accession no. EU622048                                                                               |
| 20     | EOMT_SyR        | AAGTGGGATCCAAAATGACTTG     | Reverse primer for EOMT designed from accession no. EU622048                                                                               |

**Supplementary table 2.** Details of primer sequences used for qRT-PCR analysis of transcription factors.

| S. No. | Name of primers      | Primer Sequence (5' – 3') | Details                                                                                                                               |
|--------|----------------------|---------------------------|---------------------------------------------------------------------------------------------------------------------------------------|
| 1      | bHLH_21387_RTF       | AGACTCATCACCCTGCTGTTATCA  | Forward primer designed from SRA study acc. no. SRP039008<br>(transcript id: Locus_5612_Transcript_1/6_Confidence_0.684_Length_1729)  |
| 2      | bHLH_21387_RTR       | CGGCACCGAGCTCATTTC        | Reverse primer designed from SRA study acc. no. SRP039008<br>(transcript id: Locus_5612_Transcript_1/6_Confidence_0.684_Length_1729)  |
| 3      | bHLH_25905_RTF       | TGCCATGGAGAAACAGTCATTG    | Forward primer designed from SRA study acc. no. SRP039008<br>(transcript id: Locus_7231_Transcript_1/1_Confidence_1.000_Length_1458)  |
| 4      | bHLH_25905_RTR       | CGGGACCAGAGCCATTCTT       | Reverse primer designed from SRA study acc. no. SRP039008<br>(transcript id: Locus_7231_Transcript_1/1_Confidence_1.000_Length_1458)  |
| 5      | EREB_45316_RTF       | TGGCTTCTTCTGCAGCATCAT     | Forward primer designed from SRA study acc. no. SRP039008<br>(transcript id: Locus_15957_Transcript_4/7_Confidence_0.444_Length_1969) |
| 6      | EREB_45316_RTR       | AGGGAACGGCACGACGTAT       | Reverse primer designed from SRA study acc. no. SRP039008<br>(transcript id: Locus_15957_Transcript_4/7_Confidence_0.444_Length_1969) |
| 11     | MADS-DEFB1_50254_RTF | TCCAATGGAGGACGAGCAA       | Forward primer designed from SRA study acc. no. SRP039008<br>(transcript id: Locus_19082_Transcript_1/1_Confidence_1.000_Length_531)  |
| 12     | MADS-DEFB1_50254_RTR | GCTATCCGTACAGTCGTAGAAGCA  | Reverse primer designed from SRA study acc. no. SRP039008<br>(transcript id: Locus_19082_Transcript_1/1_Confidence_1.000_Length_531)  |
| 13     | MADS-DEFB2_43518_RTF | GGCCAAAACGTAGCCAACA       | Forward primer designed from SRA study acc. no. SRP039008<br>(transcript id: Locus_15152_Transcript_2/2_Confidence_0.800_Length_826)  |
| 14     | MADS-DEFB2_43518_RTR | GGCCGCAGCTCCTCTATGT       | Reverse primer designed from SRA study acc. no. SRP039008<br>(transcript id: Locus_15152_Transcript_2/2_Confidence_0.800_Length_826)  |
| 15     | MYB2_44651_RTF       | CGTCTCCGTCCTGTCAGGTT      | Forward primer designed from SRA study acc. no. SRP039008<br>(transcript id: Locus_15644_Transcript_1/1_Confidence_1.000_Length_3464) |
| 16     | MYB2_44651_RTR       | ACCTTCCGCCAGTGGTATTG      | Reverse primer designed from SRA study acc. no. SRP039008<br>(transcript id: Locus_15644_Transcript_1/1_Confidence_1.000_Length_3464) |
| 17     | MYB3_16302_RTF       | TGCATTGATTGGGCCAGTTA      | Forward primer designed from SRA study acc. no. SRP039008<br>(transcript id: Locus_4068_Transcript_4/5_Confidence_0.733_Length_4668)  |
| 18     | MYB3_16302_RTR       | CGGTAAACTGATCCTCTGCAAA    | Reverse primer designed from SRA study acc. no. SRP039008<br>(transcript id: Locus_4068_Transcript_4/5_Confidence_0.733_Length_4668)  |
| 25     | MYB5_46226_RTF       | TGAAAACACTGGGAATGGAGTCT   | Forward primer designed from SRA study acc. no. SRP039008<br>(transcript id: Locus_16451_Transcript_3/3_Confidence_0.667_Length_2545) |
| 26     | MYB5_46226_RTR       | CAGAGTGGTGGTTGGGAAGAA     | Reverse primer designed from SRA study acc. no. SRP039008<br>(transcript id: Locus_16451_Transcript_3/3_Confidence_0.667_Length_2545) |
| 27     | MYC_47479_RTF        | TCGGCCATGCAGTATCTTCA      | Forward primer designed from SRA study acc. no. SRP039008<br>(transcript id: Locus_17158_Transcript_2/2_Confidence_0.667_Length_1002) |
| 28     | MYC_47479_RTR        | GGCGGTAGCGAGGGAAAT        | Reverse primer designed from SRA study acc. no. SRP039008<br>(transcript id: Locus_17158_Transcript_2/2_Confidence_0.667_Length_1002) |
| 31     | PAP1_34459_RTF       | CAGCCTAATATCCCTCCGAAAA    | Forward primer designed from SRA study acc. no. SRP039008<br>(transcript id: Locus_10868_Transcript_1/1_Confidence_1.000_Length_1129) |
| 32     | PAP1_34459_RTR       | CCGGCGTCCCAGAGAA          | Reverse primer designed from SRA study acc. no. SRP039008<br>(transcript id: Locus_10868_Transcript_1/1_Confidence_1.000_Length_1129) |
| 35     | TTG1_54027_RTF       | GGATCATAACAGCCGCTGTCA     | Forward primer designed from SRA study acc. no. SRP039008<br>(transcript id: Locus_21367_Transcript_1/1_Confidence_1.000_Length_2013) |

|    |                |                       |                                                                                                                                       |
|----|----------------|-----------------------|---------------------------------------------------------------------------------------------------------------------------------------|
| 36 | TTG1_54027_RTR | CGAGGCGAGCAGATTTCC    | Reverse primer designed from SRA study acc. no. SRP039008<br>(transcript id: Locus_21367_Transcript_1/1_Confidence_1.000_Length_2013) |
| 43 | WRKY OB2_RTF   | TGGAGTTTGCAGGCCATAGTC | Forward primer designed from accession no. DY337493                                                                                   |
| 44 | WRKY OB2_RTR   | CCAGACCGTCCATTTCATCT  | Reverse primer designed from accession no. DY337493                                                                                   |

**Supplementary table 3.** Six month essential oil profiling of *O. sanctum*, *O. gratissimum* and *O. kilimendscharicum*. Data represented as the average area percent.

| Compound              | <i>O. sanctum</i> (Year- 2018) |                   |                |                |                |                   | P-value      | <i>O. gratissimum</i> (Year- 2018) |                   |               |                   |               |                   | P-value      | <i>O. kilimendscharicum</i> (Year- 2018) |                   |                    |                    |                   |                   | P-value      |
|-----------------------|--------------------------------|-------------------|----------------|----------------|----------------|-------------------|--------------|------------------------------------|-------------------|---------------|-------------------|---------------|-------------------|--------------|------------------------------------------|-------------------|--------------------|--------------------|-------------------|-------------------|--------------|
|                       | Jul                            | Aug               | Sept           | Oct            | Nov            | Dec               |              | Jul                                | Aug               | Sept          | Oct               | Nov           | Dec               |              | Jul                                      | Aug               | Sept               | Oct                | Nov               | Dec               |              |
| <b>Phenylpropenes</b> |                                |                   |                |                |                |                   |              |                                    |                   |               |                   |               |                   |              |                                          |                   |                    |                    |                   |                   |              |
| Eugenol               | 62.75<br>±<br>0.28             | 60.7<br>±<br>1.41 | 64.68<br>±0.25 | 62.08<br>±0.59 | 46.54<br>±1.03 | 38.3<br>±<br>0.72 | 1.62E<br>-10 | 72.±<br>2.03                       | 72.7<br>±<br>0.62 | 74.9±<br>0.38 | 70.3<br>±<br>0.84 | 73.6±<br>3.97 | 68.4<br>±<br>0.91 | 0.063        | -                                        | -                 | -                  | -                  | -                 | -                 |              |
| Methyleugenol         | 3.07±<br>0.06                  | 0.1±<br>0.0       | -              | -              | 0.08±<br>0.01  | -                 | 1.11E<br>-16 | 0.0±<br>0.01                       | 0.02<br>±<br>0.01 | -             | -                 | -             | 0.01<br>±<br>0.00 | 3.20E<br>-03 | -                                        | -                 | -                  | -                  | -                 | -                 |              |
| trans-Isoeugenol      | -                              | -                 | -              | -              | -              | -                 | -            | -                                  | 0.01<br>±<br>0.00 | 0.03±<br>0.00 | 0.02<br>±<br>0.00 | 0.08±<br>0.01 | -                 | 3.63E<br>-05 | -                                        | -                 | -                  | -                  | -                 | -                 |              |
| Estragole             | 0.01±<br>0.0                   | 0.19<br>±<br>0.03 | -              | -              | -              | -                 | 2.01E<br>-08 | -                                  | -                 | -             | -                 | -             | -                 | -            | -                                        | -                 | -                  | -                  | -                 | -                 |              |
| <b>Monoterpenes</b>   |                                |                   |                |                |                |                   |              |                                    |                   |               |                   |               |                   |              |                                          |                   |                    |                    |                   |                   |              |
| D-Camphor             | -                              | 0.1±<br>0.00      | 0.1±<br>0.00   | -              | 0.1±<br>0.00   | 0.03<br>±<br>0.00 | 4.48E<br>-07 | -                                  | -                 | -             | -                 | -             | -                 | -            | 13±<br>3.62                              | 56.1<br>±<br>2.41 | 41.0<br>2±<br>2.10 | 30.0<br>7±<br>2.63 | 18.8<br>±<br>2.69 | 28.4<br>±<br>2.30 | 3.34E<br>-06 |
| D-Limonene            | 0.04±<br>0.00                  | 0.08<br>±<br>0.01 | 0.04±<br>0.01  | 0.02±<br>0.01  | 0.02±<br>0.00  | 0.05<br>±<br>0.00 | 3.65E<br>-05 | 0.0±<br>0.00                       | 0.01<br>±<br>0.00 | 0.01±<br>0.00 | 0.01<br>±<br>0.00 | 0.01±<br>0.00 | -                 | 0.006        | 2.63<br>±<br>0.20                        | 4.69<br>±<br>0.16 | 2.52<br>±<br>0.25  | 0.95<br>5±<br>0.05 | 0.19<br>±<br>0.02 | 0.39<br>±<br>0.06 | 9.65E<br>-09 |
| Camphene              | 0.07±<br>0.01                  | -                 | -              | 0.08±<br>0.01  | 0.07±<br>0.01  | 0.08<br>±<br>0.00 | 1.01E<br>-06 | -                                  | -                 | -             | -                 | -             | -                 | -            | 1.51<br>±<br>0.27                        | 2.92<br>±<br>0.33 | 1.77<br>±<br>0.19  | 0.28<br>±<br>0.08  | 0.17<br>±<br>0.02 | 0.21<br>±<br>0.03 | 1.13E<br>-05 |
| Endo-Borneol          | 0.22±<br>0.03                  | 0.48<br>±<br>0.03 | 0.24±<br>0.03  | 0.2±<br>0.01   | 0.18±<br>0.03  | 0.16<br>±<br>0.01 | 1.57E<br>-06 | -                                  | -                 | -             | -                 | -             | -                 | -            | -                                        | 0.85<br>±<br>0.03 | 0.51<br>±<br>0.05  | 0.36<br>±<br>0.03  | -                 | -                 | 1.06E<br>-10 |
| β-Myrcene             | -                              | -                 | -              | -              | -              | -                 | -            | 0.0±<br>0.01                       | 0.07<br>±<br>0.01 | -             | 0.08<br>±<br>0.02 | 0.04±<br>0.01 | -                 | 7.98E<br>-06 | 0.32<br>±<br>0.04                        | -                 | -                  | -                  | -                 | -                 | 1.16E<br>-08 |
| β-Ocimene             | -                              | -                 | -              | 0.02±<br>0.00  | -              | -                 | 0.458        | 4.0±<br>0.09                       | 4.05<br>±<br>0.14 | 4.71±<br>0.09 | 3.77<br>±<br>0.14 | 2.08±<br>0.60 | 2.42<br>±<br>0.12 | 3.36E<br>-05 | 0.94<br>±<br>0.25                        | 1.23<br>±<br>0.32 | 0.55<br>±<br>0.05  | -                  | -                 | -                 | 2.00E<br>-04 |
| cis-Sabinene hydrate  | -                              | -                 | -              | -              | -              | -                 | -            | 0.0±<br>0.00                       | 0.34<br>±<br>0.02 | 0.39±<br>0.04 | 0.64<br>±<br>0.05 | 0.51±<br>0.03 | 0.31<br>±<br>0.04 | 2.70E<br>-07 | -                                        | -                 | 0.49<br>±<br>0.02  | -                  | -                 | 0.43<br>±<br>0.01 | 1.14E<br>-14 |
| Sabinene              | 0.01±                          | -                 | -              | -              | -              | -                 | -            | -                                  | 0.18              | -             | 0.23              | -             | -                 | 0.567        | -                                        | -                 | -                  | -                  | -                 | -                 | -            |



|                                   |                    |                       |                    |                    |                    |                       |              |                   |                       |                    |                       |                       |                       |              |                       |                       |                    |   |                       |                       |              |
|-----------------------------------|--------------------|-----------------------|--------------------|--------------------|--------------------|-----------------------|--------------|-------------------|-----------------------|--------------------|-----------------------|-----------------------|-----------------------|--------------|-----------------------|-----------------------|--------------------|---|-----------------------|-----------------------|--------------|
|                                   |                    | 0.00                  |                    |                    |                    | 0.00                  |              |                   |                       |                    |                       |                       |                       |              |                       |                       |                    |   |                       |                       |              |
| $\beta$ -Terpineol                | -                  | -                     | -                  | -                  | -                  | -                     | -            | 0.3 $\pm$<br>0.03 | -                     | -                  | -                     | 0.04<br>$\pm$<br>0.00 | -                     | 3.98E<br>-11 | 0.28<br>$\pm$<br>0.06 | 0.91<br>$\pm$<br>0.06 | 0.49 $\pm$<br>0.05 | - | -                     | -                     | 1.20E<br>-08 |
| Myrtenol                          | -                  | -                     | -                  | -                  | -                  | -                     | -            | -                 | -                     | -                  | -                     | -                     | -                     | -            | 0.26<br>$\pm$<br>0.04 | 0.88<br>$\pm$<br>0.06 | 0.41 $\pm$<br>0.08 | - | -                     | -                     | 5.44E<br>-08 |
| Linalool                          | 0.02 $\pm$<br>0.00 | 0.14<br>$\pm$<br>0.01 | -                  | 0.03 $\pm$<br>0.00 | -                  | 0.03<br>$\pm$<br>0.00 | 5.92E<br>-09 | 0.0 $\pm$<br>0.00 | 0.05<br>$\pm$<br>0.01 | 0.04 $\pm$<br>0.01 | 0.08<br>$\pm$<br>0.03 | 0.08<br>$\pm$<br>0.02 | 0.04<br>$\pm$<br>0.01 | 9.70E<br>-03 | 0.72<br>$\pm$<br>0.08 | 1.04<br>$\pm$<br>0.06 | 0.53 $\pm$<br>0.03 | - | -                     | 0.52<br>$\pm$<br>0.05 | 1.77E<br>-08 |
| <b>Sesquiterpenes</b>             |                    |                       |                    |                    |                    |                       |              |                   |                       |                    |                       |                       |                       |              |                       |                       |                    |   |                       |                       |              |
| epi-Bicyclosesquiphel<br>landrene | -                  | -                     | -                  | -                  | -                  | -                     | -            | -                 | 2.36<br>$\pm$<br>0.00 | -                  | -                     | -                     | -                     | 0.458        | -                     | -                     | -                  | - | -                     | -                     | -            |
| Humulene                          | 0.24 $\pm$<br>0.01 | 0.26<br>$\pm$<br>0.04 | 0.41 $\pm$<br>0.03 | 0.49 $\pm$<br>0.03 | 0.45 $\pm$<br>0.02 | 1.14<br>$\pm$<br>0.07 | 3.24E<br>-09 | 0.1 $\pm$<br>0.03 | 0.09<br>$\pm$<br>0.03 | 0.13 $\pm$<br>0.03 | -                     | 0.07<br>$\pm$<br>0.02 | -                     | 5.00E<br>-04 | -                     | -                     | -                  | - | -                     | -                     | -            |
| Caryophyllene<br>oxide            | -                  | -                     | -                  | 0.07 $\pm$<br>0.01 | 0.3 $\pm$<br>0.07  | 1.08<br>$\pm$<br>0.09 | 3.69E<br>-09 | -                 | -                     | -                  | -                     | -                     | 0.14<br>$\pm$<br>0.00 | 0.458        | -                     | -                     | -                  | - | -                     | -                     | -            |
| Germacrene D                      | -                  | -                     | -                  | -                  | -                  | -                     | -            | 3.4 $\pm$<br>0.11 | 0.04<br>$\pm$<br>0.66 | 4.04 $\pm$<br>0.42 | 2.05<br>$\pm$<br>0.56 | -                     | 6.61<br>$\pm$<br>0.54 | 1.57E<br>-05 | 0.55<br>$\pm$<br>0.06 | 0.89<br>$\pm$<br>0.06 | -                  | - | -                     | -                     | 7.30E<br>-10 |
| $\beta$ -Elemene                  | 5.95 $\pm$<br>0.24 | 5.09<br>$\pm$<br>0.17 | 7.92 $\pm$<br>0.34 | 9.92 $\pm$<br>0.51 | 7.09 $\pm$<br>0.51 | 15.7<br>$\pm$<br>0.74 | 3.20E<br>-09 | 0.1 $\pm$<br>0.03 | 0.13<br>$\pm$<br>0.06 | 0.2 $\pm$<br>0.03  | 0.14<br>$\pm$<br>0.02 | 0.1 $\pm$<br>0.03     | 0.36<br>$\pm$<br>0.02 | 0.013        | -                     | -                     | -                  | - | -                     | -                     | -            |
| $\gamma$ -Selinene                | -                  | -                     | -                  | 0.25 $\pm$<br>0.02 | 0.08 $\pm$<br>0.00 | -                     | 8.91E<br>-08 | -                 | -                     | -                  | -                     | -                     | -                     | -            | -                     | -                     | -                  | - | -                     | -                     | -            |
| $\beta$ -Bourbonene               | -                  | -                     | -                  | -                  | -                  | -                     | -            | 0.1 $\pm$<br>0.03 | 0.11<br>$\pm$<br>0.02 | 0.11 $\pm$<br>0.03 | 0.08<br>$\pm$<br>0.02 | 0.13<br>$\pm$<br>0.02 | 0.2 $\pm$<br>0.03     | 0.11         | -                     | -                     | -                  | - | -                     | -                     | -            |
| $\alpha$ -Cubebene                | -                  | -                     | -                  | -                  | -                  | 0.02<br>$\pm$<br>0.00 | 5.89E<br>-06 | 0.2 $\pm$<br>0.04 | 0.14<br>$\pm$<br>0.02 | -                  | -                     | -                     | -                     | 1.62E<br>-07 | -                     | -                     | -                  | - | -                     | -                     | -            |
| $\beta$ -Cubebene                 | -                  | -                     | -                  | -                  | -                  | -                     | -            | 0.0 $\pm$<br>0.02 | 0.06<br>$\pm$<br>0.01 | 0.05 $\pm$<br>0.01 | 0.12<br>$\pm$<br>0.02 | 0.91<br>$\pm$<br>0.07 | 0.29<br>$\pm$<br>0.03 | 5.68E<br>-10 | -                     | -                     | 0.32 $\pm$<br>0.02 | - | 0.35<br>$\pm$<br>0.06 | -                     | 1.07E<br>-07 |
| Copaene                           | -                  | -                     | -                  | -                  | -                  | 0.06<br>$\pm$<br>0.00 | 1.21E<br>-12 | -                 | -                     | 0.22 $\pm$<br>0.00 | 0.28<br>$\pm$<br>0.04 | 0.23<br>$\pm$<br>0.04 | 0.65<br>$\pm$<br>0.04 | 2.42E<br>-07 | -                     | -                     | -                  | - | -                     | -                     | -            |
| <b>Sesquiterpenoid alcohols</b>   |                    |                       |                    |                    |                    |                       |              |                   |                       |                    |                       |                       |                       |              |                       |                       |                    |   |                       |                       |              |
| $\delta$ -Cadinol                 | -                  | -                     | -                  | -                  | -                  | -                     | -            | -                 | -                     | -                  | -                     | 0.02<br>$\pm$<br>0.00 | 0.15<br>$\pm$<br>0.00 | 0.458        | -                     | -                     | -                  | - | -                     | -                     | -            |

Data are means  $\pm$  SD (at least three replicates)
